# Supplementary material
Source: MDPI journal article supplement (https://www.mdpi.com/2039-4403/14/2/92)
Supplement: s1 [file s1]

Italian version of the scale 'Parental Participation in Care: Neonatal Intensive Care Unit (PPCS: NICU)''

| N.                      | ITEM                                                                                                               | 1 = mai | 2 = a volte | 3 = sempre |
|-------------------------|--------------------------------------------------------------------------------------------------------------------|---------|-------------|------------|
| 1                       | il genitore comunica con il personale sanitario                                                                    |         |             |            |
| 2                       | il genitore pone domande riguardo l'assistenza ed il trattamento di suo/a figlio/a                                 |         |             |            |
| 3                       | il genitore è disponibile a partecipare ad addestramenti erogati nella Terapia Intensiva Neonatale                 |         |             |            |
| 4                       | il genitore desidera visitare il/la proprio/a figlio/a                                                             |         |             |            |
| 5                       | il genitore desidera avere contatto fisico con il/la figlio/a (accarezzare, tenere le mani, ecc.)                  |         |             |            |
| 6                       | il genitore usa termini affettivi con suo/a figlio/a                                                               |         |             |            |
| 7                       | il genitore desidera tenere in braccio il/la figlio/a                                                              |         |             |            |
| 8                       | il genitore prova a calmare il/la proprio/a figlio/a (cullandolo, cantando, ecc.)                                  |         |             |            |
| 9                       | il genitore è attento a posizionare il/la figlio/a in una posizione comoda e consona                               |         |             |            |
| 10                      | il genitore partecipa all' alimentazione del figlio/a                                                              |         |             |            |
| 11a                     | la mamma è disposta ad allattare al seno                                                                           |         |             |            |
| 11b                     | il papà supporta la mamma affinché il figlio/a riceva latte materno                                                |         |             |            |
| 12                      | il genitore partecipa alle cure igieniche del figlio/a                                                             |         |             |            |
| 13                      | il genitore si accorge di qualsiasi peggioramento nelle condizioni generali del figlio/a                           |         |             |            |
| 14                      | il genitore desidera eseguire il contatto pelle a pelle o desidera partecipare alla kangaroo care con suo figlio/a |         |             |            |
| 15                      | il genitore supporta suo figlio/a durante procedure dolorose                                                       |         |             |            |
| 16                      | il genitore esterna le proprie emozioni e i propri pensieri                                                        |         |             |            |
| <b>PUNTEGGIO TOTALE</b> |                                                                                                                    |         |             |            |
